# Supplementary material
Source: Research Square preprint supplement (doi:10.21203/rs.3.rs-8964743/v1)
Supplement: Supplementary file 1 [file 34bc79e59f141c72bd94d90e.doc]

Additional file 1: Changes in total hospitalization costs, medical service costs, diagnosis costs, drug costs, length of stay, mortality rate and thirty-one day readmission rate of COPD patients in the People's Hospital of Ningxia Hui Autonomous Region of Yinchuan from January 2016 to December 2023

| **Year, month** | Total hospitalization expenses(RMB) | Medical service expenses(RMB) | Diagnosis expenses(RMB) | Treatment expenses(RMB) | Drug expenses(RMB) | Material expenses(RMB) | Length of stay(DAY) | Mortality rate(%) | Thirty-one day readmission rate(%) | Time | Intervention 1 | Time after intervention 1 | Intervention 2 | Time after intervention 2 |
| --- | --- | --- | --- | --- | --- | --- | --- | --- | --- | --- | --- | --- | --- | --- |
| 16-Jan | 14946.96 | 389.87 | 1562.14 | 293.47 | 4376.97 | 999.62 | 11.06 | 1.00% | 0.00% | 1.00 | 0.00 | 0.00 | 0.00 | 0.00 |
| 16-Feb | 15103.45 | 366.40 | 1552.05 | 339.03 | 4757.53 | 1012.75 | 9.33 | 1.10% | 1.70% | 2.00 | 0.00 | 0.00 | 0.00 | 0.00 |
| 16-Mar | 15078.84 | 414.31 | 1576.91 | 300.36 | 4347.52 | 1057.78 | 11.47 | 0.90% | 0.90% | 3.00 | 0.00 | 0.00 | 0.00 | 0.00 |
| 16-Apr | 14143.53 | 351.47 | 1616.13 | 315.52 | 4152.62 | 1095.59 | 10.00 | 0.00% | 0.70% | 4.00 | 0.00 | 0.00 | 0.00 | 0.00 |
| 16-May | 13693.71 | 340.08 | 1492.19 | 278.81 | 4172.89 | 924.53 | 8.92 | 0.60% | 0.00% | 5.00 | 0.00 | 0.00 | 0.00 | 0.00 |
| 16-Jun | 12662.25 | 308.99 | 1417.98 | 327.75 | 3814.61 | 779.71 | 10.67 | 0.00% | 0.00% | 6.00 | 0.00 | 0.00 | 0.00 | 0.00 |
| 16-Jul | 17280.97 | 510.59 | 1809.65 | 331.34 | 4987.80 | 1285.77 | 10.36 | 0.00% | 0.00% | 7.00 | 0.00 | 0.00 | 0.00 | 0.00 |
| 16-Aug | 12799.95 | 290.01 | 1399.10 | 314.79 | 3965.32 | 777.32 | 10.18 | 2.00% | 0.00% | 8.00 | 0.00 | 0.00 | 0.00 | 0.00 |
| 16-Sep | 12696.89 | 310.23 | 1551.34 | 315.19 | 3758.23 | 906.10 | 9.71 | 0.90% | 0.00% | 9.00 | 0.00 | 0.00 | 0.00 | 0.00 |
| 16-Oct | 13563.86 | 336.65 | 1595.04 | 390.73 | 3941.08 | 860.69 | 12.33 | 0.90% | 0.00% | 10.00 | 0.00 | 0.00 | 0.00 | 0.00 |
| 16-Nov | 15160.16 | 369.23 | 1662.70 | 426.67 | 4418.81 | 998.47 | 14.00 | 0.00% | 0.00% | 11.00 | 0.00 | 0.00 | 0.00 | 0.00 |
| 16-Dec | 14624.20 | 348.03 | 1590.59 | 297.83 | 4230.46 | 1025.43 | 10.23 | 1.40% | 0.40% | 12.00 | 0.00 | 0.00 | 0.00 | 0.00 |
| 17-Jan | 13845.86 | 361.49 | 1392.52 | 253.38 | 3970.81 | 967.17 | 10.98 | 1.00% | 0.30% | 13.00 | 0.00 | 0.00 | 0.00 | 0.00 |
| 17-Feb | 16660.41 | 539.48 | 1726.82 | 391.83 | 4500.16 | 1302.76 | 11.61 | 2.00% | 0.00% | 14.00 | 0.00 | 0.00 | 0.00 | 0.00 |
| 17-Mar | 13972.17 | 405.91 | 1668.39 | 407.57 | 3627.61 | 1026.91 | 11.26 | 0.00% | 0.00% | 15.00 | 0.00 | 0.00 | 0.00 | 0.00 |
| 17-Apr | 15482.87 | 517.81 | 1802.36 | 386.02 | 3839.75 | 1187.81 | 11.52 | 0.00% | 0.00% | 16.00 | 0.00 | 0.00 | 0.00 | 0.00 |
| 17-May | 12394.65 | 355.46 | 1448.50 | 335.99 | 3324.68 | 880.95 | 10.88 | 0.00% | 0.00% | 17.00 | 0.00 | 0.00 | 0.00 | 0.00 |
| 17-Jun | 16902.28 | 556.70 | 1954.52 | 425.68 | 4520.30 | 1375.22 | 11.47 | 0.00% | 0.00% | 18.00 | 0.00 | 0.00 | 0.00 | 0.00 |
| 17-Jul | 12365.00 | 378.22 | 1593.19 | 376.66 | 3123.63 | 1001.63 | 10.28 | 1.00% | 0.00% | 19.00 | 0.00 | 0.00 | 0.00 | 0.00 |
| 17-Aug | 12366.94 | 342.29 | 1585.32 | 330.20 | 3193.22 | 1009.77 | 10.44 | 0.00% | 0.80% | 20.00 | 0.00 | 0.00 | 0.00 | 0.00 |
| 17-Sep | 11515.10 | 334.09 | 1748.37 | 466.02 | 2827.58 | 940.40 | 10.34 | 0.00% | 0.90% | 21.00 | 0.00 | 0.00 | 0.00 | 0.00 |
| 17-Oct | 13589.31 | 432.15 | 2014.11 | 462.01 | 3289.75 | 1204.82 | 11.28 | 0.00% | 0.00% | 22.00 | 0.00 | 0.00 | 0.00 | 0.00 |
| 17-Nov | 13208.09 | 367.98 | 1981.17 | 479.93 | 3254.22 | 1103.68 | 11.54 | 0.00% | 0.00% | 23.00 | 0.00 | 0.00 | 0.00 | 0.00 |
| 17-Dec | 13469.17 | 363.27 | 2071.34 | 555.42 | 3194.46 | 1131.27 | 11.22 | 0.00% | 0.00% | 24.00 | 0.00 | 0.00 | 0.00 | 0.00 |
| 18-Jan | 15179.22 | 462.43 | 2114.58 | 541.78 | 3648.85 | 1358.18 | 10.98 | 0.90% | 0.00% | 25.00 | 1.00 | 25.00 | 0.00 | 0.00 |
| 18-Feb | 12364.57 | 327.18 | 2073.39 | 601.46 | 2769.80 | 1139.12 | 10.59 | 0.40% | 0.10% | 26.00 | 1.00 | 26.00 | 0.00 | 0.00 |
| 18-Mar | 11625.46 | 288.23 | 2041.54 | 506.96 | 2582.97 | 1112.94 | 10.20 | 0.00% | 0.00% | 27.00 | 1.00 | 27.00 | 0.00 | 0.00 |
| 18-Apr | 11491.97 | 321.88 | 2043.82 | 516.44 | 2382.72 | 1071.43 | 10.59 | 0.00% | 0.00% | 28.00 | 1.00 | 28.00 | 0.00 | 0.00 |
| 18-May | 12356.77 | 334.85 | 2116.74 | 582.67 | 2649.16 | 1116.05 | 11.32 | 0.90% | 0.00% | 29.00 | 1.00 | 29.00 | 0.00 | 0.00 |
| 18-Jun | 16624.33 | 578.34 | 2637.98 | 615.20 | 3367.99 | 2151.50 | 11.05 | 3.10% | 0.00% | 30.00 | 1.00 | 30.00 | 0.00 | 0.00 |
| 18-Jul | 12860.13 | 354.54 | 2330.08 | 512.16 | 2691.34 | 1247.96 | 10.70 | 0.60% | 1.30% | 31.00 | 1.00 | 31.00 | 0.00 | 0.00 |
| 18-Aug | 11603.26 | 307.47 | 2092.42 | 534.18 | 2412.50 | 1142.53 | 10.38 | 0.90% | 0.90% | 32.00 | 1.00 | 32.00 | 0.00 | 0.00 |
| 18-Sep | 11414.66 | 303.51 | 2128.41 | 496.06 | 2361.52 | 1157.46 | 9.89 | 0.70% | 0.70% | 33.00 | 1.00 | 33.00 | 0.00 | 0.00 |
| 18-Oct | 11749.51 | 353.44 | 2151.61 | 552.47 | 2331.92 | 1250.37 | 10.11 | 0.60% | 0.60% | 34.00 | 1.00 | 34.00 | 0.00 | 0.00 |
| 18-Nov | 11179.09 | 299.64 | 2069.05 | 519.17 | 2283.52 | 1024.18 | 10.49 | 0.50% | 1.70% | 35.00 | 1.00 | 35.00 | 0.00 | 0.00 |
| 18-Dec | 11505.76 | 315.90 | 2070.31 | 641.72 | 2334.41 | 1137.57 | 10.39 | 0.60% | 0.00% | 36.00 | 1.00 | 36.00 | 0.00 | 0.00 |
| 19-Jan | 13132.87 | 395.28 | 2248.27 | 601.91 | 2689.55 | 1270.50 | 10.49 | 1.50% | 0.70% | 37.00 | 1.00 | 37.00 | 0.00 | 0.00 |
| 19-Feb | 13439.20 | 374.65 | 2326.23 | 606.58 | 2900.72 | 1304.88 | 10.18 | 2.60% | 0.00% | 38.00 | 1.00 | 38.00 | 0.00 | 0.00 |
| 19-Mar | 13738.92 | 372.51 | 2386.83 | 619.03 | 2917.30 | 1362.58 | 11.21 | 1.10% | 0.00% | 39.00 | 1.00 | 39.00 | 0.00 | 0.00 |
| 19-Apr | 12988.42 | 385.55 | 2360.43 | 568.34 | 2540.51 | 1297.33 | 10.76 | 0.00% | 0.00% | 40.00 | 1.00 | 40.00 | 0.00 | 0.00 |
| 19-May | 13009.37 | 386.22 | 2395.94 | 587.44 | 2472.60 | 1332.53 | 10.72 | 1.30% | 0.00% | 41.00 | 1.00 | 41.00 | 0.00 | 0.00 |
| 19-Jun | 12207.24 | 370.89 | 2285.83 | 583.80 | 2322.91 | 1308.23 | 10.54 | 0.50% | 1.10% | 42.00 | 1.00 | 42.00 | 0.00 | 0.00 |
| 19-Jul | 10414.52 | 302.40 | 2083.89 | 532.40 | 1921.46 | 1102.74 | 9.99 | 0.70% | 0.70% | 43.00 | 1.00 | 43.00 | 0.00 | 0.00 |
| 19-Aug | 11497.28 | 338.00 | 2194.32 | 550.57 | 2309.57 | 1159.53 | 10.24 | 0.70% | 1.40% | 44.00 | 1.00 | 44.00 | 0.00 | 0.00 |
| 19-Sep | 10581.61 | 316.19 | 2085.80 | 454.71 | 1937.38 | 1163.95 | 9.46 | 1.30% | 0.00% | 45.00 | 1.00 | 45.00 | 0.00 | 0.00 |
| 19-Oct | 12443.28 | 373.33 | 2414.44 | 538.75 | 2242.73 | 1376.35 | 10.69 | 1.20% | 0.00% | 46.00 | 1.00 | 46.00 | 0.00 | 0.00 |
| 19-Nov | 11822.32 | 351.50 | 2223.51 | 550.07 | 2065.63 | 1402.64 | 10.18 | 1.00% | 0.50% | 47.00 | 1.00 | 47.00 | 0.00 | 0.00 |
| 19-Dec | 12489.95 | 344.42 | 2377.75 | 554.47 | 2378.81 | 1338.87 | 10.33 | 1.60% | 0.80% | 48.00 | 1.00 | 48.00 | 0.00 | 0.00 |
| 20-Jan | 12834.94 | 407.25 | 1211.86 | 298.33 | 2152.23 | 1346.34 | 9.90 | 0.30% | 0.30% | 49.00 | 1.00 | 49.00 | 0.00 | 0.00 |
| 20-Feb | 13450.81 | 381.14 | 1272.58 | 304.40 | 2355.67 | 1430.11 | 9.43 | 1.00% | 0.00% | 50.00 | 1.00 | 50.00 | 0.00 | 0.00 |
| 20-Mar | 12887.70 | 382.87 | 1345.76 | 329.69 | 1851.98 | 1484.30 | 10.51 | 0.80% | 0.00% | 51.00 | 1.00 | 51.00 | 0.00 | 0.00 |
| 20-Apr | 13371.12 | 398.61 | 1345.03 | 332.08 | 2096.29 | 1429.03 | 10.22 | 0.00% | 0.00% | 52.00 | 1.00 | 52.00 | 0.00 | 0.00 |
| 20-May | 10564.20 | 295.68 | 1077.51 | 272.20 | 1676.38 | 1132.43 | 10.31 | 0.70% | 0.70% | 53.00 | 1.00 | 53.00 | 0.00 | 0.00 |
| 20-Jun | 11571.55 | 360.17 | 1211.60 | 284.86 | 1678.43 | 1324.54 | 10.14 | 0.00% | 0.00% | 54.00 | 1.00 | 54.00 | 0.00 | 0.00 |
| 20-Jul | 11046.25 | 286.16 | 1168.39 | 279.65 | 1696.17 | 1206.69 | 10.43 | 0.00% | 0.00% | 55.00 | 1.00 | 55.00 | 0.00 | 0.00 |
| 20-Aug | 11536.91 | 342.72 | 1206.28 | 287.20 | 1696.05 | 1337.65 | 10.24 | 0.90% | 0.00% | 56.00 | 1.00 | 56.00 | 0.00 | 0.00 |
| 20-Sep | 10488.13 | 296.28 | 1084.98 | 271.04 | 1599.34 | 1167.62 | 10.40 | 0.00% | 0.80% | 57.00 | 1.00 | 57.00 | 0.00 | 0.00 |
| 20-Oct | 11411.22 | 346.82 | 1164.31 | 262.58 | 1726.78 | 1245.06 | 9.71 | 0.00% | 0.60% | 58.00 | 1.00 | 58.00 | 0.00 | 0.00 |
| 20-Nov | 9955.27 | 294.55 | 1045.94 | 259.72 | 1459.37 | 1039.83 | 9.88 | 0.50% | 0.00% | 59.00 | 1.00 | 59.00 | 0.00 | 0.00 |
| 20-Dec | 12460.92 | 424.58 | 1221.44 | 321.65 | 1926.77 | 1262.67 | 10.60 | 0.60% | 0.00% | 60.00 | 1.00 | 60.00 | 0.00 | 0.00 |
| 21-Jan | 10357.54 | 306.99 | 2172.21 | 524.60 | 2614.76 | 1232.01 | 9.65 | 0.00% | 1.20% | 61.00 | 1.00 | 61.00 | 1.00 | 61.00 |
| 21-Feb | 10444.04 | 299.33 | 2176.08 | 510.91 | 2794.44 | 1094.97 | 9.82 | 0.70% | 0.00% | 62.00 | 1.00 | 62.00 | 1.00 | 62.00 |
| 21-Mar | 10031.74 | 296.41 | 2214.84 | 512.28 | 2258.16 | 1129.31 | 9.60 | 0.30% | 0.00% | 63.00 | 1.00 | 63.00 | 1.00 | 63.00 |
| 21-Apr | 10005.34 | 349.92 | 2071.06 | 529.34 | 2362.88 | 1082.98 | 9.68 | 0.00% | 0.00% | 64.00 | 1.00 | 64.00 | 1.00 | 64.00 |
| 21-May | 10787.77 | 399.61 | 2223.97 | 584.48 | 2518.98 | 1092.10 | 9.92 | 0.00% | 0.00% | 65.00 | 1.00 | 65.00 | 1.00 | 65.00 |
| 21-Jun | 9420.94 | 347.76 | 1977.56 | 558.05 | 1941.32 | 949.49 | 9.78 | 0.00% | 0.60% | 66.00 | 1.00 | 66.00 | 1.00 | 66.00 |
| 21-Jul | 10470.15 | 433.02 | 2104.34 | 522.42 | 2316.29 | 1063.18 | 9.25 | 0.00% | 0.00% | 67.00 | 1.00 | 67.00 | 1.00 | 67.00 |
| 21-Aug | 12503.41 | 554.32 | 2390.04 | 683.76 | 3101.14 | 1207.99 | 10.27 | 0.00% | 0.90% | 68.00 | 1.00 | 68.00 | 1.00 | 68.00 |
| 21-Sep | 8605.28 | 318.86 | 1818.67 | 499.09 | 1829.33 | 859.12 | 8.65 | 0.00% | 0.90% | 69.00 | 1.00 | 69.00 | 1.00 | 69.00 |
| 21-Oct | 9592.46 | 382.18 | 2034.09 | 531.43 | 1992.06 | 890.11 | 9.12 | 0.70% | 0.70% | 70.00 | 1.00 | 70.00 | 1.00 | 70.00 |
| 21-Nov | 11009.33 | 453.50 | 2279.88 | 643.56 | 2102.24 | 1013.77 | 10.22 | 0.00% | 1.00% | 71.00 | 1.00 | 71.00 | 1.00 | 71.00 |
| 21-Dec | 8842.90 | 366.17 | 1917.55 | 574.04 | 1334.96 | 854.15 | 9.65 | 1.10% | 0.00% | 72.00 | 1.00 | 72.00 | 1.00 | 72.00 |
| 22-Jan | 8696.53 | 353.26 | 1921.83 | 510.19 | 1286.68 | 852.23 | 9.19 | 0.00% | 0.40% | 73.00 | 1.00 | 73.00 | 1.00 | 73.00 |
| 22-Feb | 11445.11 | 486.79 | 2358.42 | 589.18 | 2007.48 | 1060.94 | 9.48 | 0.60% | 0.60% | 74.00 | 1.00 | 74.00 | 1.00 | 74.00 |
| 22-Mar | 9304.36 | 373.33 | 2040.03 | 546.05 | 1487.96 | 900.88 | 9.04 | 0.00% | 0.00% | 75.00 | 1.00 | 75.00 | 1.00 | 75.00 |
| 22-Apr | 8933.28 | 387.38 | 2013.76 | 521.66 | 1249.02 | 826.58 | 8.96 | 0.00% | 0.00% | 76.00 | 1.00 | 76.00 | 1.00 | 76.00 |
| 22-May | 8838.73 | 370.08 | 1964.76 | 575.21 | 1219.68 | 794.91 | 9.82 | 0.00% | 0.00% | 77.00 | 1.00 | 77.00 | 1.00 | 77.00 |
| 22-Jun | 8170.89 | 410.45 | 1785.73 | 522.91 | 1135.45 | 710.51 | 8.91 | 0.00% | 0.00% | 78.00 | 1.00 | 78.00 | 1.00 | 78.00 |
| 22-Jul | 7584.80 | 337.74 | 1638.92 | 529.66 | 1101.01 | 636.18 | 9.08 | 0.00% | 1.00% | 79.00 | 1.00 | 79.00 | 1.00 | 79.00 |
| 22-Aug | 6374.76 | 275.80 | 1413.13 | 438.86 | 931.84 | 538.54 | 8.49 | 0.00% | 0.00% | 80.00 | 1.00 | 80.00 | 1.00 | 80.00 |
| 22-Sep | 6916.66 | 273.57 | 1660.84 | 443.03 | 1010.94 | 564.74 | 8.40 | 0.00% | 0.90% | 81.00 | 1.00 | 81.00 | 1.00 | 81.00 |
| 22-Oct | 8516.68 | 355.69 | 1778.88 | 441.44 | 1448.72 | 671.28 | 8.25 | 0.00% | 0.00% | 82.00 | 1.00 | 82.00 | 1.00 | 82.00 |
| 22-Nov | 8948.16 | 408.01 | 1809.79 | 488.31 | 1571.62 | 688.61 | 8.85 | 0.00% | 0.00% | 83.00 | 1.00 | 83.00 | 1.00 | 83.00 |
| 22-Dec | 8261.18 | 318.08 | 1770.68 | 529.14 | 1209.77 | 913.14 | 8.30 | 1.20% | 0.00% | 84.00 | 1.00 | 84.00 | 1.00 | 84.00 |
| 23-Jan | 11853.19 | 641.14 | 2062.94 | 623.54 | 2048.10 | 945.42 | 9.80 | 0.50% | 0.00% | 85.00 | 1.00 | 85.00 | 1.00 | 85.00 |
| 23-Feb | 7648.08 | 319.33 | 1711.75 | 506.91 | 1190.92 | 693.29 | 8.76 | 0.00% | 0.00% | 86.00 | 1.00 | 86.00 | 1.00 | 86.00 |
| 23-Mar | 8024.27 | 321.27 | 1750.42 | 466.96 | 1235.62 | 737.65 | 8.32 | 0.00% | 0.00% | 87.00 | 1.00 | 87.00 | 1.00 | 87.00 |
| 23-Apr | 9007.11 | 376.09 | 2026.80 | 538.13 | 1300.75 | 878.08 | 8.88 | 0.00% | 0.00% | 88.00 | 1.00 | 88.00 | 1.00 | 88.00 |
| 23-May | 7838.47 | 293.32 | 1773.32 | 490.11 | 1147.86 | 716.80 | 8.42 | 0.00% | 0.00% | 89.00 | 1.00 | 89.00 | 1.00 | 89.00 |
| 23-Jun | 9191.25 | 369.04 | 1944.86 | 520.71 | 1493.05 | 794.13 | 8.81 | 0.00% | 0.00% | 90.00 | 1.00 | 90.00 | 1.00 | 90.00 |
| 23-Jul | 10790.12 | 515.75 | 2181.16 | 509.16 | 1840.50 | 931.19 | 8.87 | 0.70% | 0.70% | 91.00 | 1.00 | 91.00 | 1.00 | 91.00 |
| 23-Aug | 7869.96 | 301.40 | 1852.53 | 442.78 | 1179.06 | 749.10 | 7.66 | 0.00% | 0.00% | 92.00 | 1.00 | 92.00 | 1.00 | 92.00 |
| 23-Sep | 7490.76 | 309.81 | 1711.35 | 487.74 | 960.92 | 727.32 | 7.90 | 0.00% | 0.00% | 93.00 | 1.00 | 93.00 | 1.00 | 93.00 |
| 23-Oct | 7153.38 | 287.84 | 1673.07 | 455.30 | 899.50 | 661.54 | 8.32 | 0.90% | 0.00% | 94.00 | 1.00 | 94.00 | 1.00 | 94.00 |
| 23-Nov | 9227.41 | 401.49 | 2018.86 | 589.31 | 1153.06 | 855.45 | 8.95 | 0.00% | 0.00% | 95.00 | 1.00 | 95.00 | 1.00 | 95.00 |
| 23-Dec | 9246.41 | 427.38 | 2098.14 | 562.70 | 1044.40 | 793.13 | 8.63 | 0.00% | 0.00% | 96.00 | 1.00 | 96.00 | 1.00 | 96.00 |
